# Supplementary material
Source: PubMed Central journal article supplement (PMC10277841)
Supplement: mmc1.pdf [file mmc1.pdf]

**Supplemental Information**

**Silencing mouse circular RNA *circSlc8a1*  
by circular antisense *cA-circSlc8a1* induces  
cardiac hepatopathy**

**Nan Wu, Feiya Li, Weining Yang, William W. Du, Faryal Mehwish Awan, Chao Zhang, Juanjuan Lyu, Sema Misir, Kaixuan Zeng, Esra Eshaghi, and Burton B. Yang**

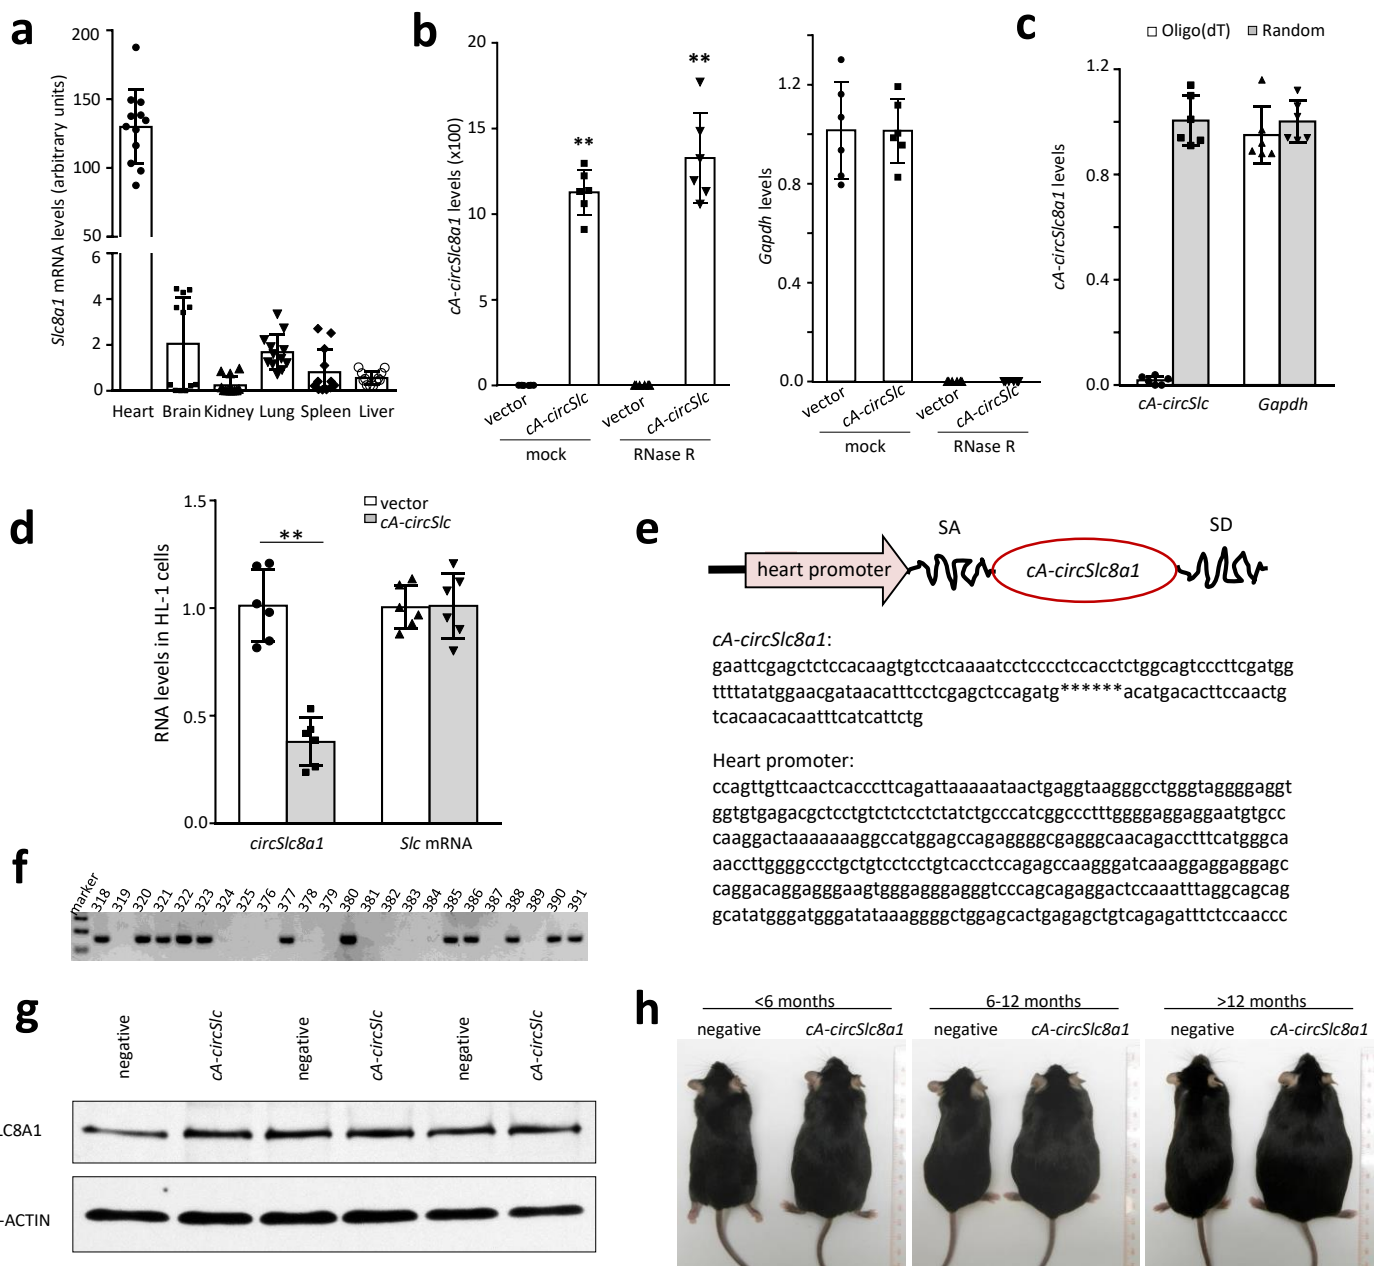

**Supplementary Fig. S1. Generation of *circSlc8a1* knockdown mice by using circular antisense-*circSlc8a1* (*cA-circSlc8a1* or *cA-circSlc*) expression construct**

- (a) The expression levels of linear *Slc8a1* mRNA in different organs. n=12
- (b) The *cA-circSlc8a1* construct was transfected into human HEK293T cells. The expression of *cA-circSlc8a1* (left) and *Slc8a1* mRNA (right) with or without RNase R treatment were determined by using mouse specific primers. n=6, \*\*<0.01 vs vector control.
- (c) The *cA-circSlc8a1* construct was transfected into human HEK293T cells. The RNAs from vector or *cA-circSlc8a1* transfected cells were reverse transcribed using random or oligo(dT) primers followed by qPCR using mouse specific primers. n=6, \*\*<0.01 vs vector control.
- (d) The levels of unbound *circSlc8a1* and *Slc8a1* mRNA in HL-1 cells transfected with *cA-circSlc8a1*. n=6, \*\*<0.01 vs vector control.
- (e) The construct were used to generate *cA-circSlc8a1* transgenic mice. The 5' and 3' sequences of *cA-circSlc8a1* and the heart promoter sequence are shown.
- (f) Genotyping that validated the establishment of *cA-circSLC8A1* (+) transgenic mice.
- (g) The levels of the SLC8A1 protein in the heart of *cA-circSlc8a1* transgenic mice.
- (h) Representative photographs of *cA-circSlc8a1* (+) transgenic mice compared to the age-matched negative mice.

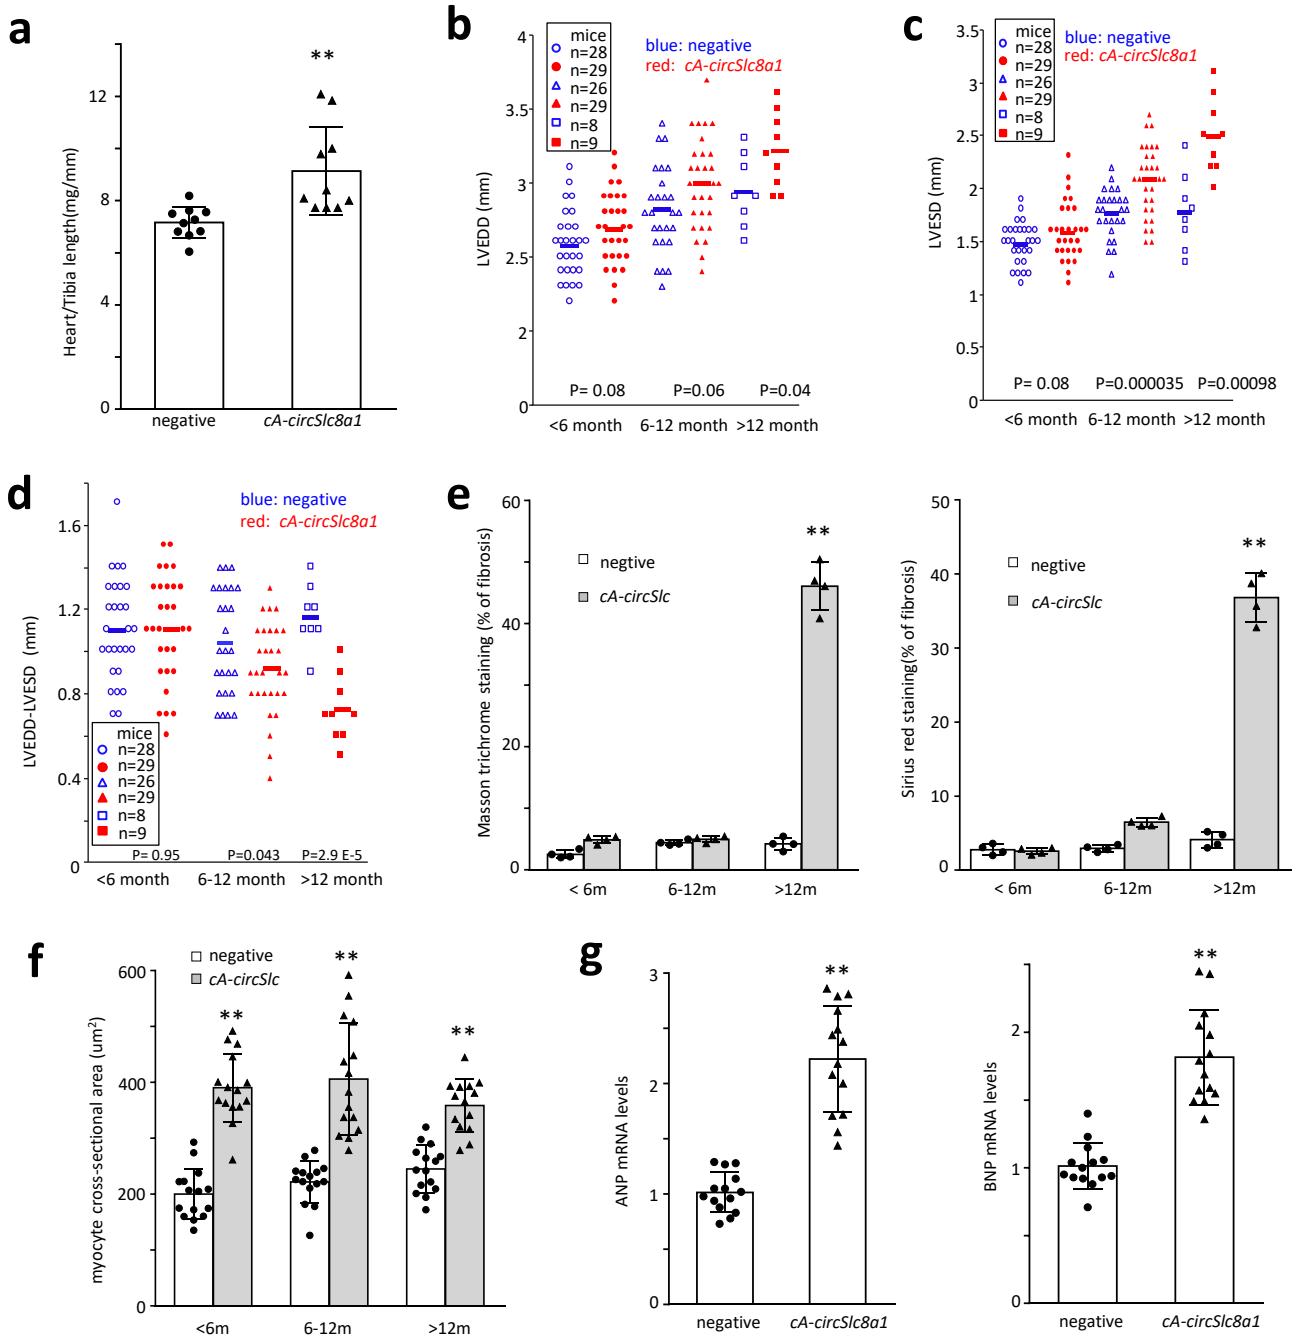

**Supplementary Fig. S2. Analysis of heart function and fibrosis in the *cA-circSlc8a1* transgenic mice.**

- (a) The heart/tibia length ratio of *cA-circSlc8a1*(+) mice was significantly higher compared to litter match negative mice. n=10, \*\* p<0.01 vs negative.
- (b) Echocardiography of *cA-circSlc8a1*(+) mice showed elevated left ventricular end-diastolic diameter (LVEDD) compared to litter match negative mice.
- (c) Echocardiography of *cA-circSlc8a1*(+) mice showed elevated left ventricular end-systolic dimension (LVESD) compared to litter match negative mice.
- (d) Echocardiography of *cA-circSlc8a1*(+) mice showed reduced LVEDD-LVESD compared to litter match negative mice.
- (e) Quantification of fibrosis area observed by Masson trichrome staining (left), Sirius red staining (right). n=4, \*\* p<0.01 vs negative.
- (f) Quantification of cross-section area of cardiomyocytes by WGA staining. n=15, \*\* p<0.01 vs negative.
- (g) RNAs isolated from heart tissues of mice aged 6-12 month old were subjected to real-time qPCR to measure levels of ANP (left) and BNP (right). n=14, \*\* p<0.01.

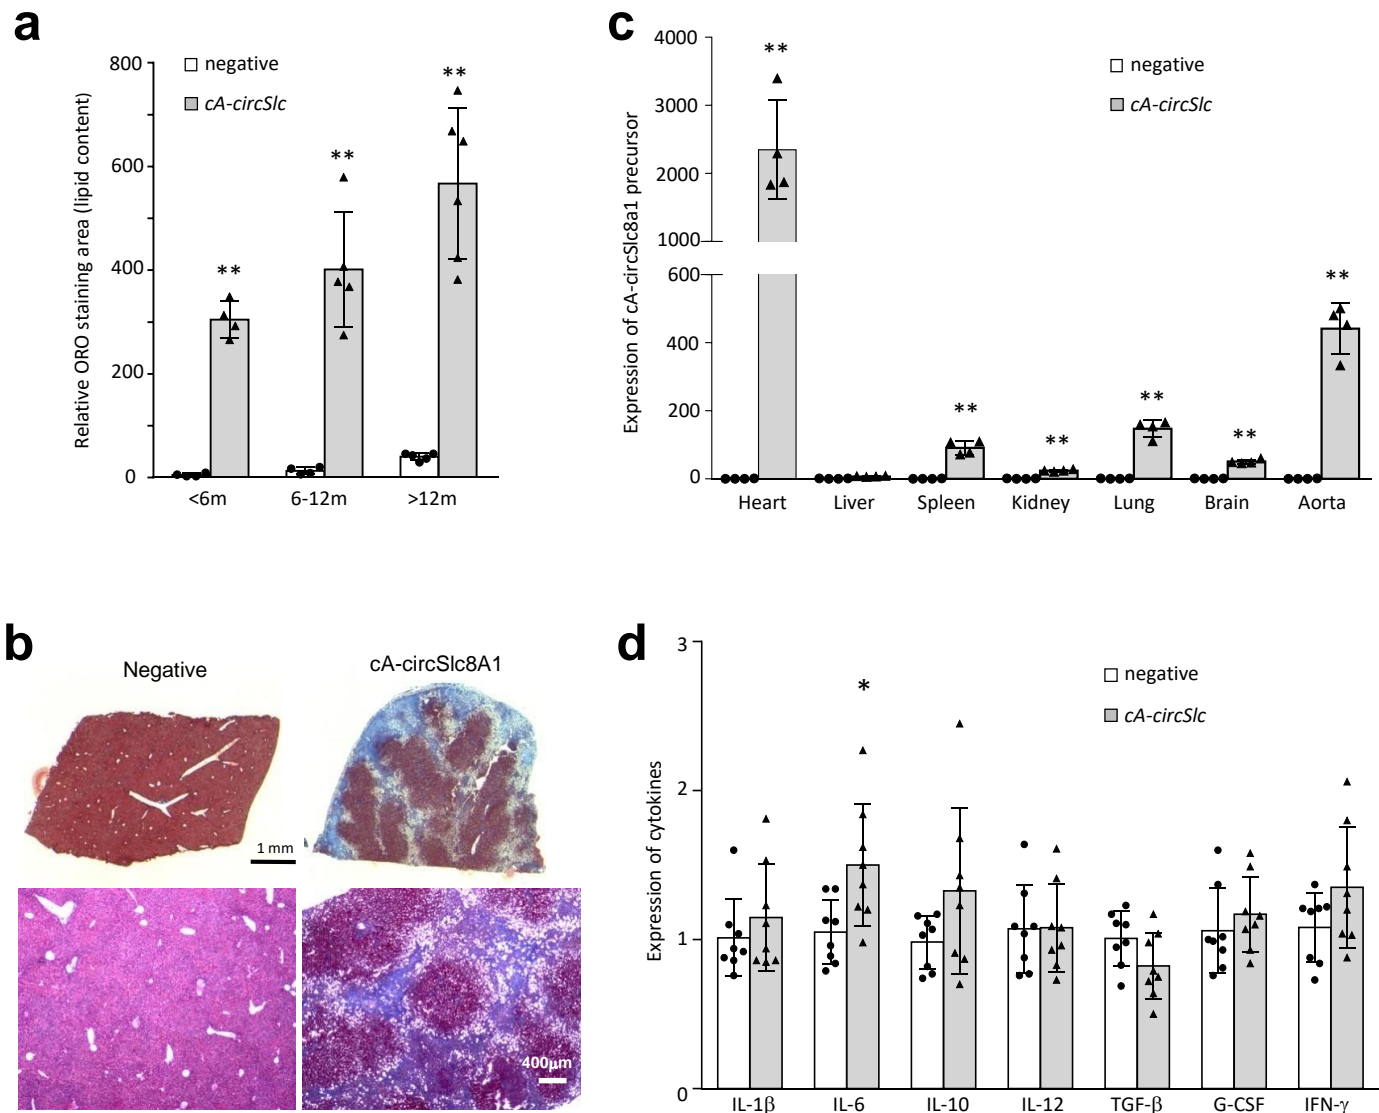

**Supplementary Fig. S3. Transgenic mice with heart-specific expression of *cA-circSlc8a1* develop hepatic steatosis.**

- (a) Quantification of lipid content observed by Oil-Red-O staining. n=6, \*\* p<0.01 vs negative.
- (b) Hepatic fibrosis/cirrhosis was developed in some of the *cA-circSlc8a1* mice (2 out of 14) at late stage, which examined by Masson trichrome staining.
- (c) The expression of *cA-circSlc8a1* precursor in different organs. n=4, \*\* p<0.01 vs negative.
- (d) The levels of cytokines measured by real-time PCR. \* p<0.05 vs negative

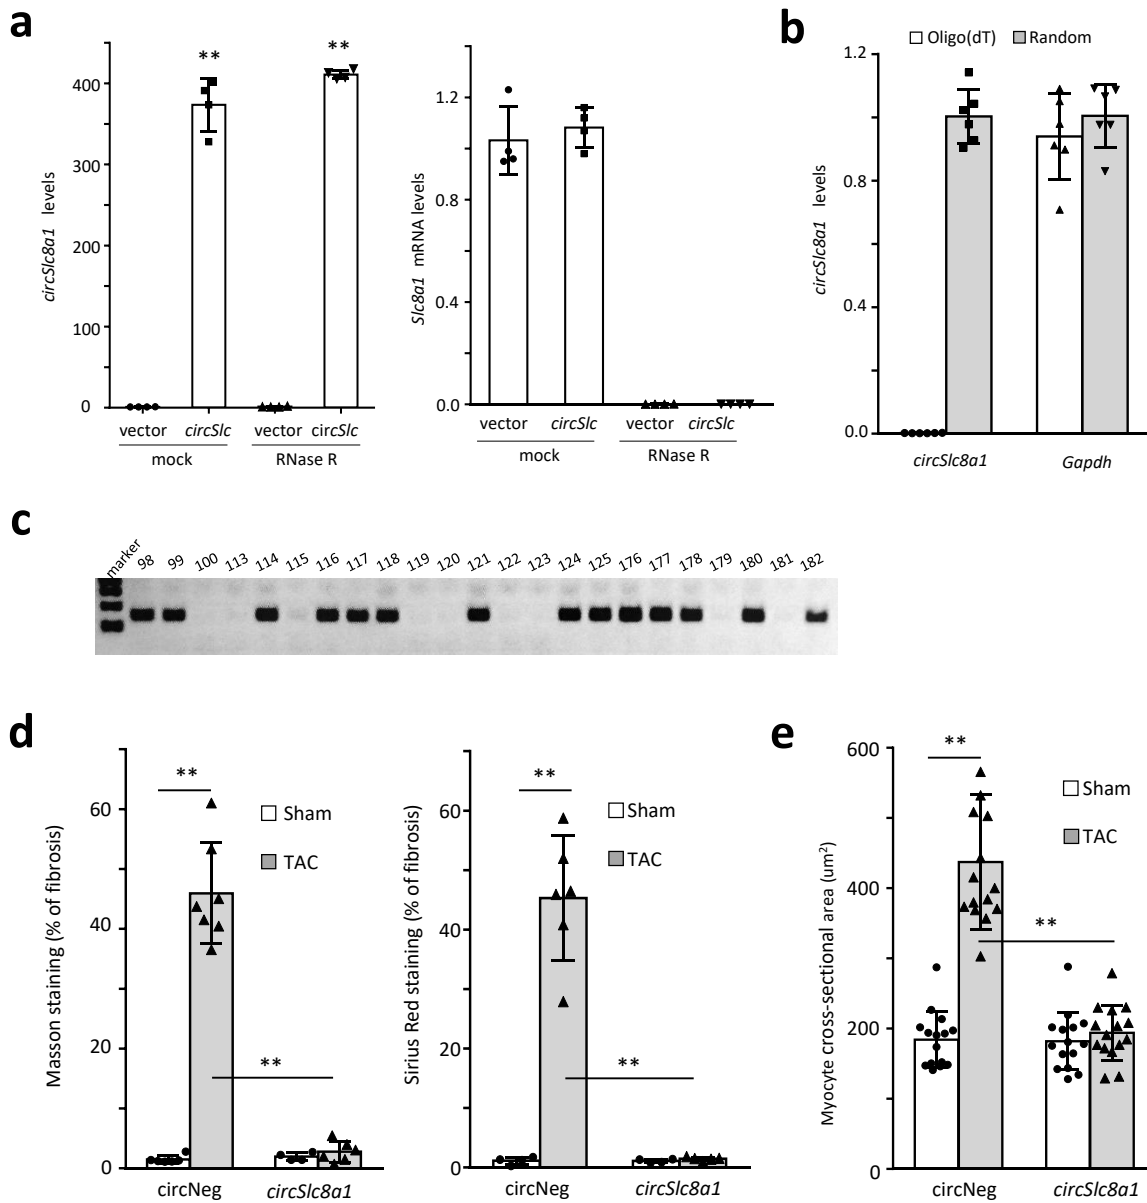

**Supplementary Fig. S4. Generation of *circSlc8a1* transgenic mice and validation of the cardiac protective effects of *circSlc8a1*.**

- (a) The *circSlc8a1* constructs were transfected into human cell line HEK293T. The levels of *circSlc8a1* (left) and *Slc8a1* mRNA (right) with or without RNase R treatment were determined by using mouse specific primers respectively. n=4, \*\*<0.01 vs vector control.
- (b) The *circSlc8a1* constructs were transfected into human cell line HEK293T. The RNA were reverse transcribed by using random or oligo(dT) primers. The levels of *circSlc8a1* were determined by using mouse specific primers. n=6, \*\*<0.01 vs vector control.
- (c) Genotyping that validated the establishment of *circSlc8a1* (+) transgenic mice.
- (d) Quantification of fibrosis area observed by Masson trichrome staining (left) and Sirius red staining (right). n=6, \*\* p<0.01
- (e) Quantification of cross-section area of cardiomyocytes by WGA staining. n=15, \*\* p<0.01

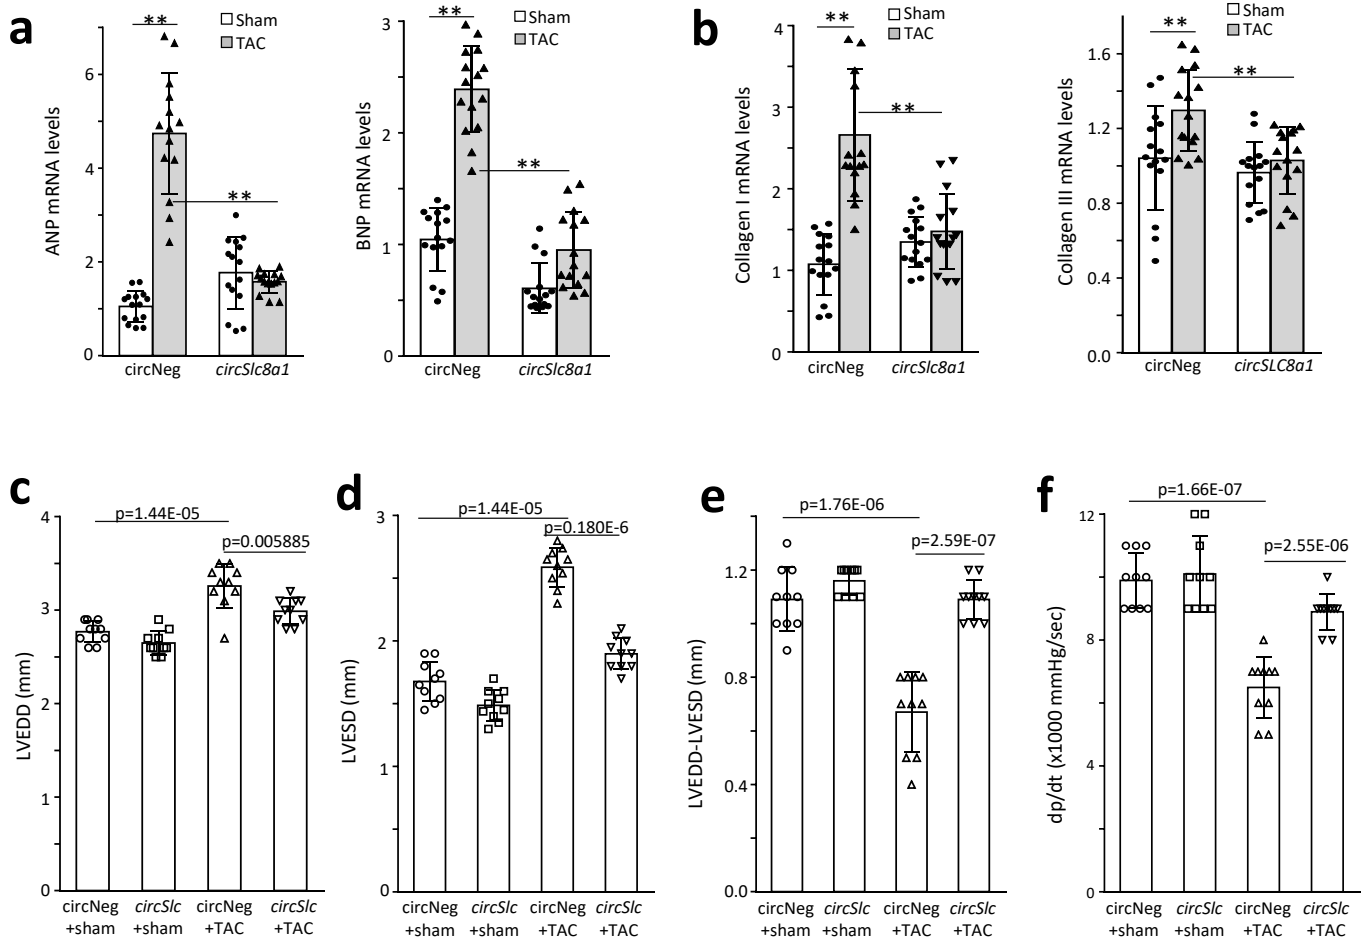

**Supplementary Fig. S5. The *circSlc8a1* protect the heart from cardiac hypertrophy, cardiac fibrosis and impaired heart function.**

- (a) The levels of heart failure markers ANP (left) and BNP (right) were remarkably increased in the heart of negative mice by TAC surgery, while were significantly lower in the *circSlc8a1* (+) mice compared to the litter match negative mice after TAC surgery. n=15, \*\* p<0.01.
- (b) The levels of cardiac fibrosis markers collagen-I (left) and collagen-III (right) were remarkably increased in the heart of negative mice by TAC surgery, while were significantly lower in the *circSlc8a1*-transgenic mice compared to the litter match negative mice after TAC surgery. n=15, \*\* p<0.01.
- (c-f) The *circSlc8a1*(+) mice subjected to TAC prevented the impair of heart function that validated by (c) LVEDD, (d) LVESD, (e) LVEDD-LVESD, and (f) left ventricular pressure (dp/dt). n=10

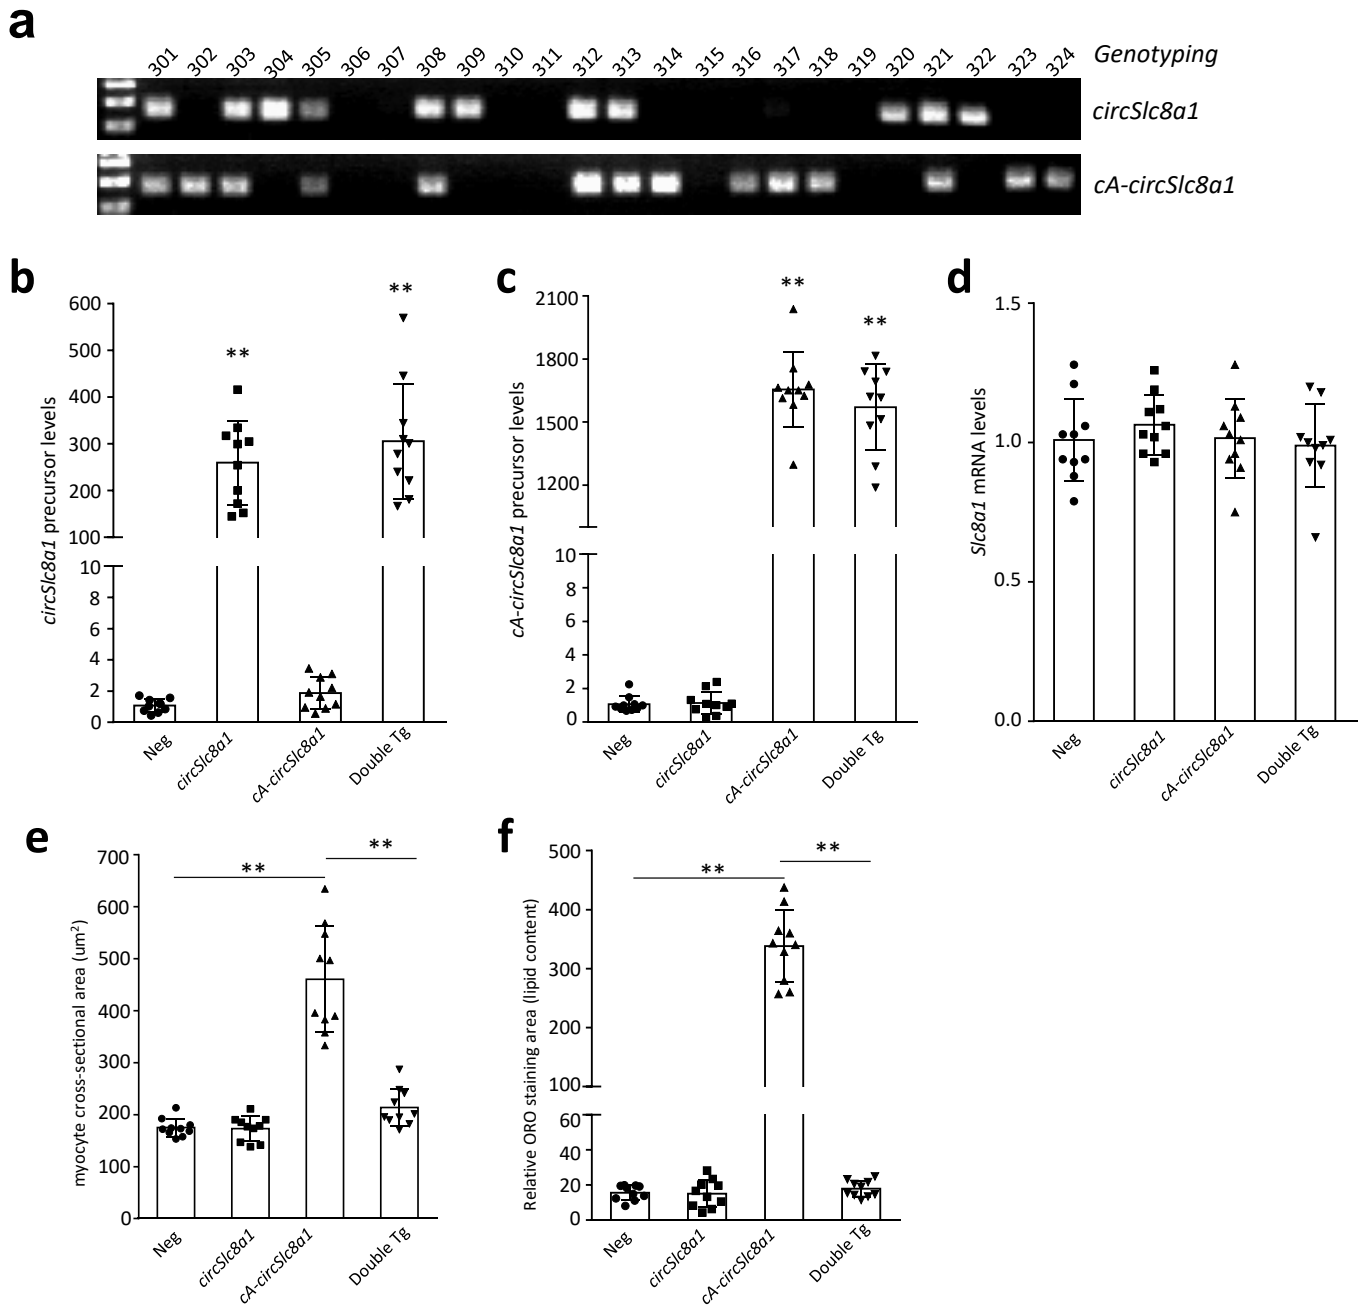

**Supplementary Fig. S6. Generation of double transgenic mice with ectopic expression of both *circSlc8a1* and *cA-circSlc8a1*.**

- (a) Genotyping that validated the establishment of *circSlc8a1* (+) transgenic mice.
- (b) The expression levels of *circSlc8a1* precursor in negative (Neg), *circSlc8a1* (+) transgenic mice, *cA-circSlc8a1* (+) transgenic mice, or double transgenic mice. n=10, \*\*<0.01 vs negative mice.
- (c) The expression levels of *cA-circSlc8a1* precursor in negative (Neg), *circSlc8a1* (+) transgenic mice, *cA-circSlc8a1* (+) transgenic mice, or double transgenic mice. n=10, \*\*<0.01 vs negative mice.
- (d) The expression levels of *Slc8a1* mRNA in negative (Neg), *circSlc8a1* (+) transgenic mice, *cA-circSlc8a1* (+) transgenic mice, or double transgenic mice. n=10
- (e) Quantification of cross-section area of cardiomyocytes by WGA staining. n=10, \*\* p<0.01
- (f) Quantification of lipid content observed by Oil Red O. n=10, \*\* p<0.01

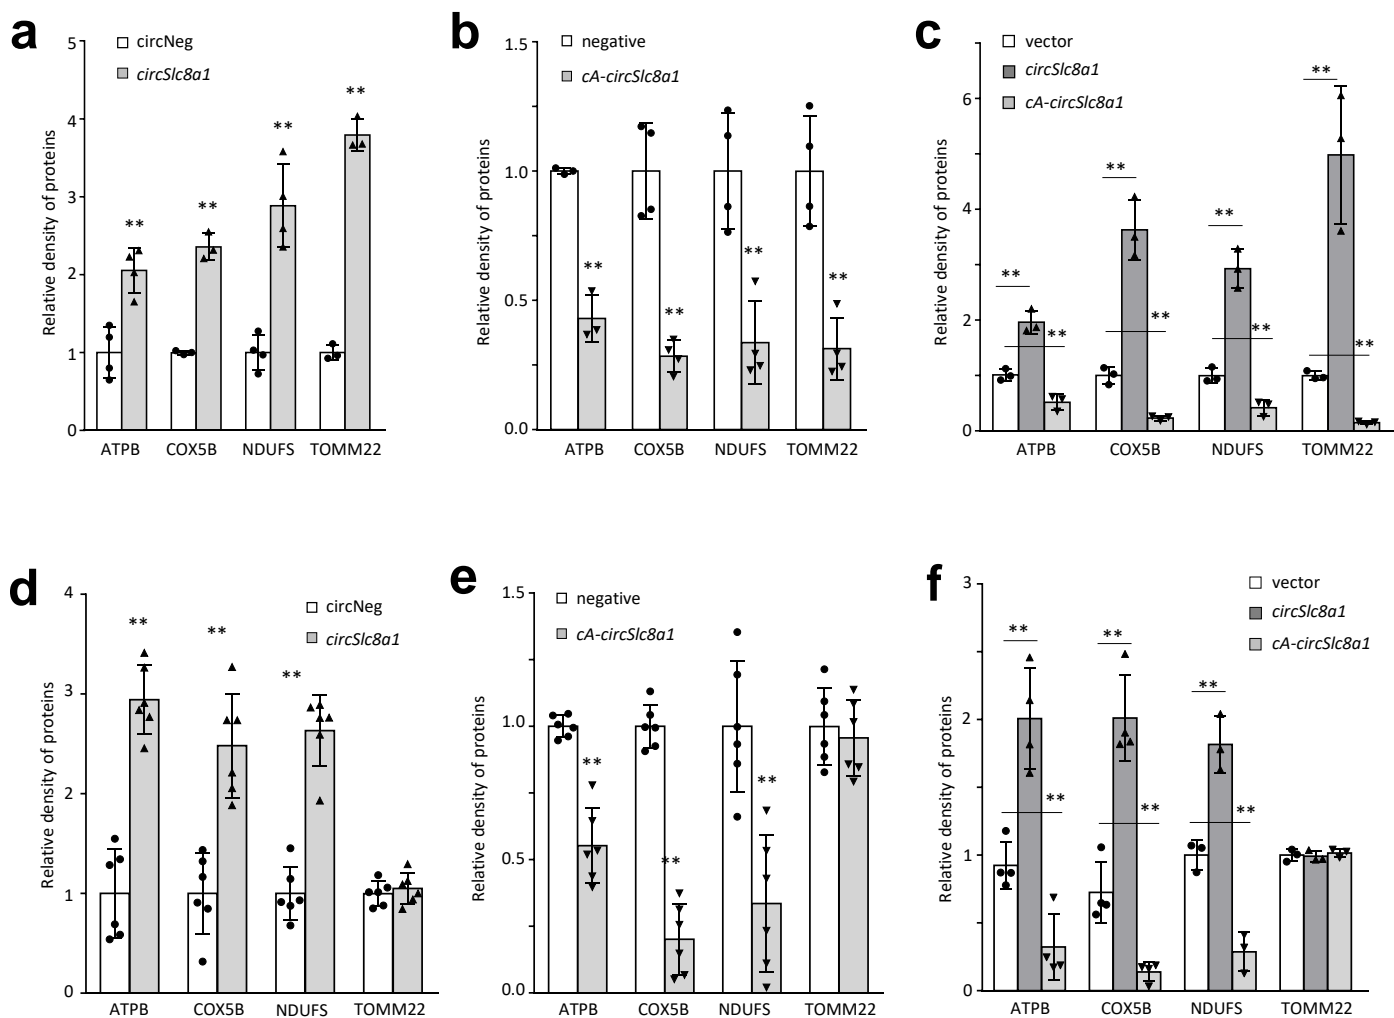

**Supplementary Fig. S7. The *circSlc8a1* protected heart function via binding with mitochondrial proteins.**

(a-c) The density of the bands in Western blot images presented in Fig.7a-c regarding the *circSlc8a1* pull down proteins was analysis. \*\*  $p < 0.01$ ,  $n = 3-4$

(d-f) The density of the bands in Western blot images presented in Fig.7d-f regarding the mitochondrial translocation of proteins was analysis. \*\*  $p < 0.01$ ,  $n = 4-6$



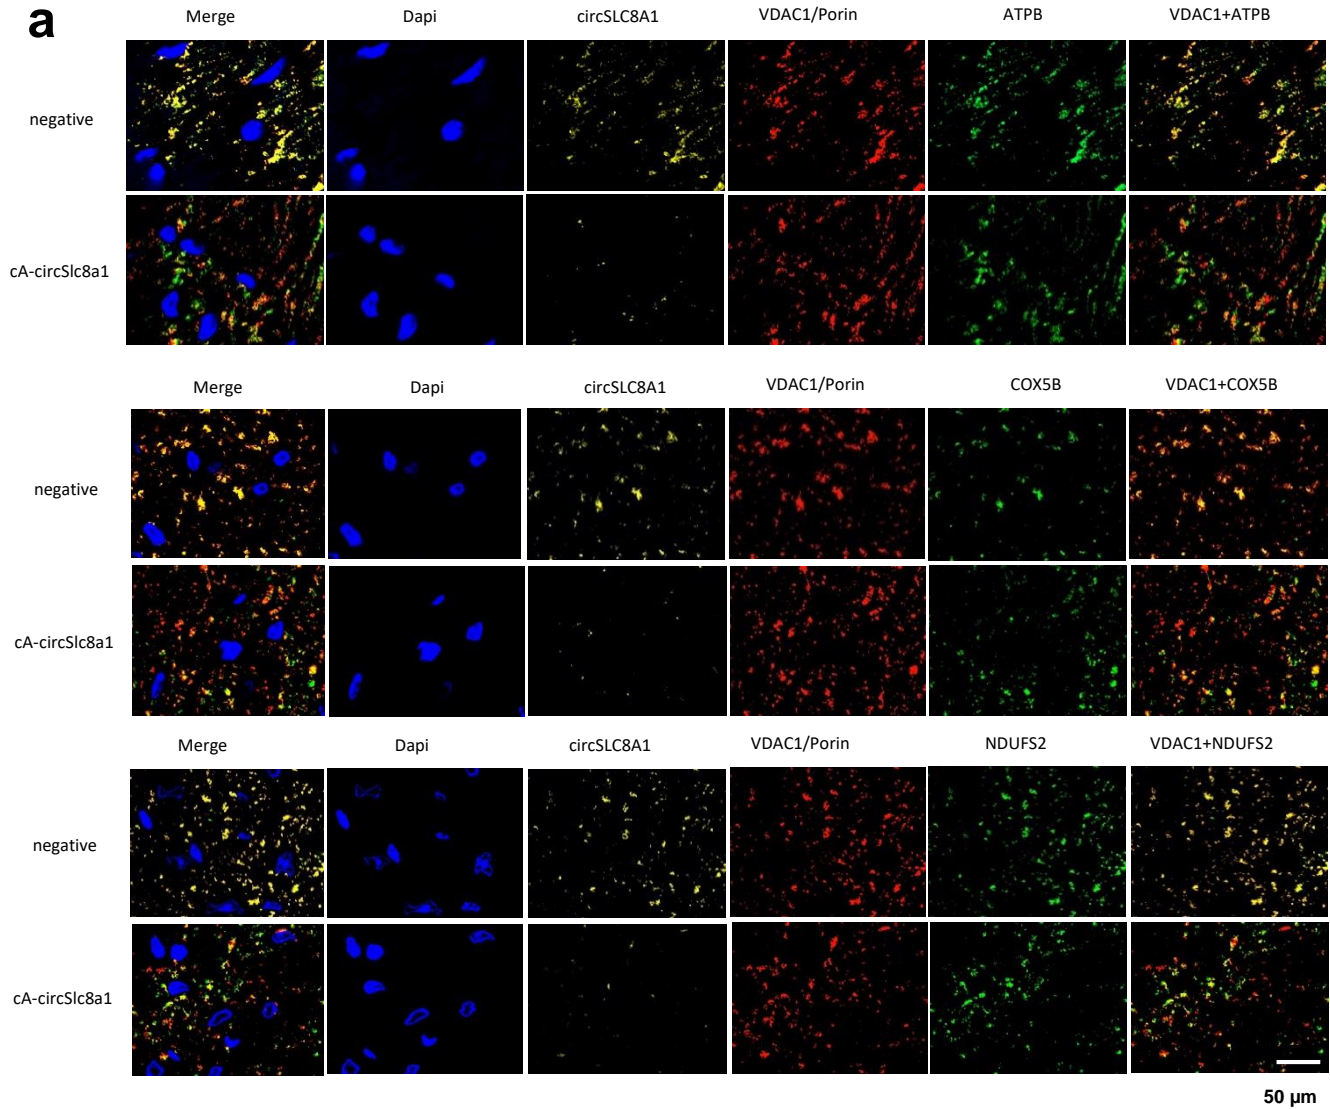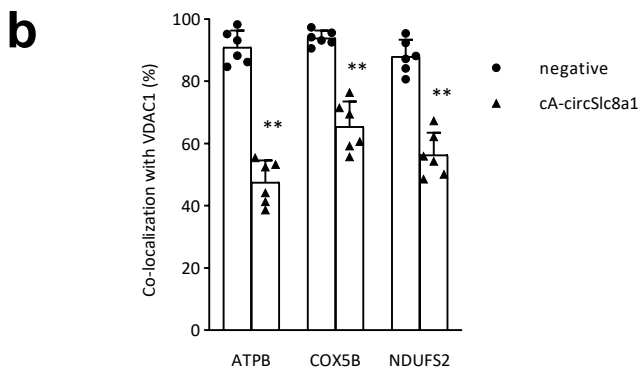

**Supplementary Fig. S8. Co-localization of *circSlc8a1* with ATPB, COX5B, and NDUFS2.**

Fig (a) In situ hybridization of *circSlc8a1* and immunofluorescence staining of ATPB, COX5B, and NDUFS2 in the *cA-circSlc8a1* transgenic and litter-matched negative mice. Representative photographs show co-localization of *circSlc8a1* with these mitochondrial proteins. (b) Quantitation of the staining. \*\*,  $p < 0.01$ .

**Supplementary Table 1: Protein identified by mass spectrometry analysis**

| #  | Identified Proteins (750)                                                                                                                                    | Accession Number |         | Molecular Weight |         | circular dichroism (CD) | Fold change |
|----|--------------------------------------------------------------------------------------------------------------------------------------------------------------|------------------|---------|------------------|---------|-------------------------|-------------|
|    |                                                                                                                                                              | Number           | ID      | Weight           | circNeg |                         |             |
| 1  | ATP synthase subunit beta, mitochondrial OS=Mus musculus (Mouse) OX=10090 GN=Atp5f1b PE=1 SV=2                                                               | PE6480           | Atp5f1b | 56 kDa           | 662.99  | 1,208.20                | 1.82        |
| 2  | ATP synthase subunit alpha, mitochondrial OS=Mus musculus (Mouse) OX=10090 GN=Atp5f1a PE=1 SV=1                                                              | Q30265           | Atp5f1a | 60 kDa           | 284.4   | 494.04                  | 1.74        |
| 3  | Methylcrotonyl-CoA carboxylase beta chain, mitochondrial OS=Mus musculus (Mouse) OX=10090 GN=Mccc2 PE=1 SV=1                                                 | Q3ULD5           | Mccc2   | 61 kDa           | 204.99  | 284.7                   | 1.39        |
| 4  | NADH-ubiquinone oxidoreductase 75 kDa subunit, mitochondrial OS=Mus musculus (Mouse) OX=10090 GN=Ndufs1 PE=1 SV=2                                            | Q91VD9           | Ndufs1  | 80 kDa           | 164.36  | 261.97                  | 1.59        |
| 5  | ATP synthase coupling factor 6, mitochondrial OS=Mus musculus (Mouse) OX=10090 GN=Atp5pd PE=1 SV=3                                                           | Q9DCX2           | Atp5pd  | 19 kDa           | 83.105  | 131.56                  | 1.58        |
| 6  | ATP synthase subunit c, mitochondrial OS=Mus musculus (Mouse) OX=10090 GN=Atp5pc PE=1 SV=1                                                                   | P97450           | Atp5pc  | 12 kDa           | 57.25   | 117.23                  | 2.05        |
| 7  | NADH dehydrogenase [ubiquinone] flavoprotein 1, mitochondrial OS=Mus musculus (Mouse) OX=10090 GN=Ndufv1 PE=1 SV=1                                           | Q91Y70           | Ndufv1  | 51 kDa           | 72.948  | 117.23                  | 1.61        |
| 8  | Alpha-actinin-2 OS=Mus musculus (Mouse) OX=10090 GN=Actr2 PE=1 SV=2                                                                                          | Q9J191           | Actr2   | 104 kDa          | 87.722  | 114.84                  | 1.31        |
| 9  | Succinate dehydrogenase [ubiquinone] flavoprotein subunit, mitochondrial OS=Mus musculus (Mouse) OX=10090 GN=Sdhb PE=1 SV=1                                  | Q8J821           | Sdhb    | 73 kDa           | 65.561  | 96.894                  | 1.48        |
| 10 | NADH dehydrogenase [ubiquinone] iron-sulfur protein 2, mitochondrial OS=Mus musculus (Mouse) OX=10090 GN=Ndufs2 PE=1 SV=1                                    | Q91WD5           | Ndufs2  | 53 kDa           | 45.246  | 95.698                  | 2.12        |
| 11 | Trifunctional enzyme subunit alpha, mitochondrial OS=Mus musculus (Mouse) OX=10090 GN=Hadha PE=1 SV=1                                                        | Q8BMS1           | Hadha   | 83 kDa           | 30.472  | 92.109                  | 3.02        |
| 12 | Propionyl-CoA carboxylase alpha chain, mitochondrial OS=Mus musculus (Mouse) OX=10090 GN=Pcca PE=1 SV=2                                                      | Q91ZA3           | Pcca    | 80 kDa           | 55.403  | 88.521                  | 1.60        |
| 13 | Caveolae-associated protein 2 OS=Mus musculus (Mouse) OX=10090 GN=Cavin2 PE=1 SV=3                                                                           | Q63918           | Cavin2  | 47 kDa           | 63.714  | 86.128                  | 1.35        |
| 14 | NADH dehydrogenase [ubiquinone] iron-sulfur protein 3, mitochondrial OS=Mus musculus (Mouse) OX=10090 GN=Ndufs3 PE=1 SV=2                                    | Q9DCT2           | Ndufs3  | 30 kDa           | 42.476  | 71.774                  | 1.69        |
| 15 | ATP synthase subunit delta, mitochondrial OS=Mus musculus (Mouse) OX=10090 GN=Atp5fd PE=1 SV=1                                                               | Q9D3D9           | Atp5fd  | 18 kDa           | 39.706  | 70.577                  | 1.78        |
| 16 | NADH dehydrogenase [ubiquinone] flavoprotein 2, mitochondrial OS=Mus musculus (Mouse) OX=10090 GN=Ndufv2 PE=1 SV=2                                           | Q9DGJ6           | Ndufv2  | 27 kDa           | 48.016  | 69.381                  | 1.44        |
| 17 | IF rod domain-containing protein OS=Mus musculus (Mouse) OX=10090 GN=Krf83 PE=1 SV=1                                                                         | ESQYI9           | Krf83   | 53 kDa           | 0       | 52.634                  | 1.50        |
| 18 | NADH dehydrogenase [ubiquinone] iron-sulfur protein 6, mitochondrial OS=Mus musculus (Mouse) OX=10090 GN=Ndufs6 PE=1 SV=2                                    | P52503           | Ndufs6  | 13 kDa           | 35.089  | 56.634                  | 2.86        |
| 19 | Trifunctional enzyme subunit beta, mitochondrial OS=Mus musculus (Mouse) OX=10090 GN=Hadhb PE=1 SV=1                                                         | Q98JY0           | Hadhb   | 51 kDa           | 17.544  | 50.241                  | 2.86        |
| 20 | ATP synthase subunit O, mitochondrial OS=Mus musculus (Mouse) OX=10090 GN=Atp5po PE=1 SV=1                                                                   | Q9DBE20          | Atp5po  | 23 kDa           | 30.472  | 49.045                  | 1.61        |
| 21 | Alpha-crystallin B chain OS=Mus musculus (Mouse) OX=10090 GN=Cryab PE=1 SV=2                                                                                 | P23927           | Cryab   | 20 kDa           | 30.472  | 47.849                  | 1.57        |
| 22 | Ceatalmer subunit epsilon OS=Mus musculus (Mouse) OX=10090 GN=Cope PE=1 SV=3                                                                                 | Q89079           | Cope    | 35 kDa           | 22.161  | 46.653                  | 2.11        |
| 23 | NADH dehydrogenase [ubiquinone] iron-sulfur protein 5, mitochondrial OS=Mus musculus (Mouse) OX=10090 GN=Ndufs5 PE=1 SV=1                                    | Q8K3J1           | Ndufs5  | 24 kDa           | 29.549  | 46.653                  | 1.58        |
| 24 | Methylcrotonyl-CoA carboxylase subunit alpha, mitochondrial OS=Mus musculus (Mouse) OX=10090 GN=Mccc1 PE=1 SV=2                                              | Q99MR8           | Mccc1   | 79 kDa           | 30.472  | 46.653                  | 1.53        |
| 25 | Lipoamide acyltransferase component of branched-chain alpha-keto acid dehydrogenase complex, mitochondrial OS=Mus musculus (Mouse) OX=10090 GN=Dbt PE=1 SV=3 | P53395           | Dbt     | 53 kDa           | 31.395  | 43.064                  | 1.37        |
| 26 | Casein kinase II subunit beta OS=Mus musculus (Mouse) OX=10090 GN=Csk2b PE=1 SV=1                                                                            | P67871           | Csk2b   | 25 kDa           | 24.932  | 39.475                  | 1.58        |
| 27 | Cytochrome c oxidase subunit 5B, mitochondrial OS=Mus musculus (Mouse) OX=10090 GN=Cox5b PE=1 SV=1                                                           | P19536           | Cox5b   | 14 kDa           | 17.544  | 38.279                  | 2.18        |
| 28 | Casein kinase II subunit alpha OS=Mus musculus (Mouse) OX=10090 GN=Csk2a1 PE=1 SV=2                                                                          | Q60737           | Csk2a1  | 45 kDa           | 21.238  | 38.279                  | 1.80        |
| 29 | Serine beta-lactamase-like protein LACTB, mitochondrial OS=Mus musculus (Mouse) OX=10090 GN=Lactb PE=1 SV=1                                                  | Q8EP89           | Lactb   | 61 kDa           | 19.391  | 28.709                  | 1.48        |
| 30 | Histone H4 OS=Mus musculus (Mouse) OX=10090 GN=H4f16 PE=1 SV=2                                                                                               | P62806           | H4f16   | 11 kDa           | 19.391  | 27.513                  | 1.42        |
| 31 | ATP synthase subunit gamma, mitochondrial OS=Mus musculus (Mouse) OX=10090 GN=Atp5f1c PE=1 SV=1                                                              | Q91VR2           | Atp5f1c | 33 kDa           | 17.544  | 25.121                  | 1.43        |
| 32 | Transcriptional activator protein Pur-alpha OS=Mus musculus (Mouse) OX=10090 GN=Pura PE=1 SV=1                                                               | P42869           | Pura    | 35 kDa           | 10.157  | 22.728                  | 2.24        |
| 33 | RNA-binding motif protein, X chromosome OS=Mus musculus (Mouse) OX=10090 GN=RbmX PE=1 SV=1                                                                   | Q9WV02           | RbmX    | 14.774           | 14.774  | 21.532                  | 1.46        |
| 34 | 2-oxoisovalerate dehydrogenase subunit alpha, mitochondrial OS=Mus musculus (Mouse) OX=10090 GN=Bckdha PE=1 SV=1                                             | P50136           | Bckdha  | 50 kDa           | 16.621  | 21.532                  | 1.30        |
| 35 | Pentatricopeptide repeat domain-containing protein 3, mitochondrial OS=Mus musculus (Mouse) OX=10090 GN=Ptcp3 PE=1 SV=2                                      | Q14C51           | Ptcp3   | 78 kDa           | 16.621  | 21.532                  | 1.30        |
| 36 | NADH dehydrogenase [ubiquinone] 1 alpha subcomplex subunit 5 OS=Mus musculus (Mouse) OX=10090 GN=Ndufa5 PE=1 SV=3                                            | Q9CYP6           | Ndufa5  | 13 kDa           | 12.927  | 20.336                  | 1.57        |
| 37 | Adenylylate kinase isoenzyme 1 OS=Mus musculus (Mouse) OX=10090 GN=Ak1 PE=1 SV=1                                                                             | Q9ROY5           | Ak1     | 22 kDa           | 12.927  | 19.14                   | 1.48        |
| 38 | 28S ribosomal protein S22, mitochondrial OS=Mus musculus (Mouse) OX=10090 GN=Mps22 PE=1 SV=1                                                                 | Q8CXW2           | Mps22   | 41 kDa           | 14.774  | 19.14                   | 1.30        |
| 39 | Acy-CoA dehydrogenase family member 10 OS=Mus musculus (Mouse) OX=10090 GN=Acad10 PE=1 SV=1                                                                  | ESQ0F0           | Acad10  | 119 kDa          | 0       | 16.747                  | 1.68        |
| 40 | IF rod domain-containing protein OS=Mus musculus (Mouse) OX=10090 GN=Krt78 PE=1 SV=1                                                                         | Q9JHE7           | Krt78   | 112 kDa          | 9.2339  | 15.551                  | 1.68        |
| 41 | Protein TSSC4 OS=Mus musculus (Mouse) OX=10090 GN=Tssc4 PE=1 SV=1                                                                                            | Q9JHE7           | Tssc4   | 34 kDa           | 9.2339  | 15.551                  | 1.68        |
| 42 | Hemoglobin subunit alpha OS=Mus musculus (Mouse) OX=10090 GN=Hba PE=1 SV=2                                                                                   | P01942           | Hba     | 15 kDa           | 12.004  | 14.355                  | 1.73        |
| 43 | (E3-independent) E2 ubiquitin-conjugating enzyme UBE2O OS=Mus musculus (Mouse) OX=10090 GN=Ube2o PE=1 SV=3                                                   | Q6ZPL3           | Ube2o   | 141 kDa          | 8.3105  | 14.355                  | 1.55        |
| 44 | Peroxisomal protein 22 OS=Mus musculus (Mouse) OX=10090 GN=Pdx1 PE=1 SV=1                                                                                    | P35700           | Pdx1    | 22 kDa           | 9.2339  | 14.355                  | 1.55        |
| 45 | 60S acidic ribosomal protein P2 OS=Mus musculus (Mouse) OX=10090 GN=Rplp2 PE=1 SV=3                                                                          | P99027           | Rplp2   | 12 kDa           | 10.157  | 14.355                  | 1.41        |
| 46 | Transcriptional activator protein Pur-beta OS=Mus musculus (Mouse) OX=10090 GN=Purb PE=1 SV=3                                                                | Q35295           | Purb    | 34 kDa           | 9.2339  | 13.158                  | 1.42        |
| 47 | Calmodulin-1 OS=Mus musculus (Mouse) OX=10090 GN=Calm1 PE=1 SV=1                                                                                             | P0DP26           | Calm1   | 17 kDa           | 5.5403  | 11.962                  | 2.16        |
| 48 | Cytochrome b-c1 complex subunit 6, mitochondrial OS=Mus musculus (Mouse) OX=10090 GN=Uqcrcf PE=1 SV=2                                                        | P98028           | Uqcrcf  | 10 kDa           | 5.5403  | 11.962                  | 2.16        |
| 49 | Histone H2B type 1-F/JL OS=Mus musculus (Mouse) OX=10090 GN=H2bc7 PE=1 SV=2                                                                                  | P10653           | H2bc7   | 14 kDa           | 6.4637  | 11.962                  | 1.85        |
| 50 | cAMP-dependent protein kinase type II-alpha regulatory subunit OS=Mus musculus (Mouse) OX=10090 GN=Pkr2a PE=1 SV=2                                           | P12367           | Pkr2a   | 45 kDa           | 5.5403  | 10.766                  | 1.94        |
| 51 | AP-3 complex subunit sigma-2 OS=Mus musculus (Mouse) OX=10090 GN=Ap3s2 PE=1 SV=1                                                                             | Q8BSZ2           | Ap3s2   | 22 kDa           | 7.3871  | 10.766                  | 1.46        |
| 52 | Elongation factor 1-alpha 2 OS=Mus musculus (Mouse) OX=10090 GN=Eef1a2 PE=1 SV=1                                                                             | P62631           | Eef1a2  | 50 kDa           | 7.3871  | 10.766                  | 1.46        |
| 53 | Small nuclear ribonucleoprotein Sm D2 OS=Mus musculus (Mouse) OX=10090 GN=Snrdp2 PE=1 SV=1                                                                   | P62317           | Snrdp2  | 14 kDa           | 8.3105  | 10.766                  | 1.30        |
| 54 | Enhancer of rudimentary homolog OS=Mus musculus (Mouse) OX=10090 GN=Erh PE=1 SV=1                                                                            | P84089           | Erh     | 12 kDa           | 5.5403  | 9.5698                  | 1.73        |
| 55 | 14-3-3 protein gamma OS=Mus musculus (Mouse) OX=10090 GN=Ywhag PE=1 SV=2                                                                                     | PE1982           | Ywhag   | 28 kDa           | 6.4637  | 9.5698                  | 1.48        |
| 56 | Beta-enolase OS=Mus musculus (Mouse) OX=10090 GN=Eno3 PE=1 SV=3                                                                                              | P21550           | Eno3    | 47 kDa           | 6.4637  | 9.5698                  | 1.48        |
| 57 | Junctophilin-2 OS=Mus musculus (Mouse) OX=10090 GN=Jph2 PE=1 SV=2                                                                                            | Q8ET78           | Jph2    | 75 kDa           | 6.4637  | 9.5698                  | 1.48        |
| 58 | Ribosome-binding protein 1 OS=Mus musculus (Mouse) OX=10090 GN=Rtbp1 PE=1 SV=2                                                                               | Q99PL5           | Rtbp1   | 173 kDa          | 6.4637  | 9.5698                  | 1.48        |
| 59 | Serine/threonine-protein phosphatase 2A catalytic subunit alpha isoform OS=Mus musculus (Mouse) OX=10090 GN=Ppp2ca PE=1 SV=1                                 | P63330           | Ppp2ca  | 36 kDa           | 7.3871  | 9.5698                  | 1.48        |
| 60 | Huntingtin-interacting protein K OS=Mus musculus (Mouse) OX=10090 GN=Hypk PE=1 SV=2                                                                          | Q9CR41           | Hypk    | 15 kDa           | 6.4637  | 9.5698                  | 1.30        |
| 61 | Complement C1q and tumor necrosis factor-related protein 9 OS=Mus musculus (Mouse) OX=10090 GN=C1qtnf9 PE=1 SV=1                                             | Q4ZJN1           | C1qtnf9 | 35 kDa           | 3.6936  | 8.3736                  | 2.27        |
| 62 | NADH dehydrogenase [ubiquinone] 1 beta subcomplex subunit 11, mitochondrial OS=Mus musculus (Mouse) OX=10090 GN=Ndufb11 PE=1 SV=2                            | Q09111           | Ndufb11 | 17 kDa           | 5.5403  | 8.3736                  | 1.51        |
| 63 | 2-oxoisovalerate dehydrogenase subunit beta, mitochondrial OS=Mus musculus (Mouse) OX=10090 GN=Bckdhb PE=1 SV=2                                              | Q6P3A8           | Bckdhb  | 43 kDa           | 6.4637  | 8.3736                  | 1.30        |



Supplementary Table 1 (continued): Protein identified by mass spectrometry analysis

| #   | Identified Proteins (750)                                                                                                                | Accession Number | ID        | Molecular Weight | circNeg | circSLC8A1 | Fold change |
|-----|------------------------------------------------------------------------------------------------------------------------------------------|------------------|-----------|------------------|---------|------------|-------------|
|     |                                                                                                                                          |                  |           |                  |         |            |             |
| 64  | ATP synthase subunit epsilon, mitochondrial OS=Mus musculus (Mouse) OX=10090 GN=Atp5f1e PE=1 SV=2                                        | P56382           | Atp5f1e   | 6 kDa            | 6.4637  | 8.3736     | 1.30        |
| 65  | Thioredoxin-dependent peroxidase reductase, mitochondrial OS=Mus musculus (Mouse) OX=10090 GN=Prdx3 PE=1 SV=1                            | P20108           | Prdx3     | 28 kDa           | 6.4637  | 8.3736     | 1.30        |
| 66  | Poly(U)-binding splicing factor PUF60 OS=Mus musculus (Mouse) OX=10090 GN=Puif60 PE=1 SV=2                                               | Q3UEB3           | Puif60    | 60 kDa           | 2.7702  | 7.1774     | 2.59        |
| 67  | AP-2 complex subunit sigma OS=Mus musculus (Mouse) OX=10090 GN=Ap2s1 PE=1 SV=1                                                           | P82743           | Ap2s1     | 17 kDa           | 3.6936  | 7.1774     | 1.94        |
| 68  | Protein NDRG2 OS=Mus musculus (Mouse) OX=10090 GN=Ndrp2 PE=1 SV=1                                                                        | Q9QYG0           | Ndrp2     | 41 kDa           | 3.6936  | 7.1774     | 1.94        |
| 69  | Serine/arginine-rich splicing factor 7 OS=Mus musculus (Mouse) OX=10090 GN=Srsf7 PE=1 SV=1                                               | Q8BL97           | Srsf7     | 31 kDa           | 3.6936  | 7.1774     | 1.94        |
| 70  | Pre-mRNA-processing factor 40 homolog A OS=Mus musculus (Mouse) OX=10090 GN=Prip40a PE=1 SV=1                                            | Q8R1C7           | Prip40a   | 108 kDa          | 4.617   | 7.1774     | 1.55        |
| 71  | Sorbin and SH3 domain-containing protein 2 OS=Mus musculus (Mouse) OX=10090 GN=Sorts2 PE=1 SV=2                                          | Q3UT12           | Sorts2    | 132 kDa          | 4.617   | 7.1774     | 1.55        |
| 72  | Transketolase pyruvate domain-containing protein OS=Mus musculus (Mouse) OX=10090 GN=Ogthl PE=1 SV=1                                     | EQ7L70           | Ogthl     | 117 kDa          | 4.617   | 7.1774     | 1.55        |
| 73  | Glutaredoxin-related protein 5, mitochondrial OS=Mus musculus (Mouse) OX=10090 GN=Girx5 PE=1 SV=2                                        | Q8DY14           | Girx5     | 16 kDa           | 5.5403  | 7.1774     | 1.30        |
| 74  | Cysteine-rich protein 2 OS=Mus musculus (Mouse) OX=10090 GN=Crip2 PE=1 SV=1                                                              | Q8DXT8           | Crip2     | 23 kDa           | 0       | 5.9811     |             |
| 75  | Elongation factor 1-beta OS=Mus musculus (Mouse) OX=10090 GN=Eef1b PE=1 SV=5                                                             | O70251           | Eef1b     | 25 kDa           | 1.8468  | 5.9811     | 3.24        |
| 76  | ADP synthase subunit I, mitochondrial OS=Mus musculus (Mouse) OX=10090 GN=Atp5m1 PE=1 SV=3                                               | P86135           | Atp5m1    | 10 kDa           | 2.7702  | 5.9811     | 2.16        |
| 77  | NADH dehydrogenase [ubiquinone] 1 alpha subcomplex assembly factor 3 OS=Mus musculus (Mouse) OX=10090 GN=Ndufa3 PE=1 SV=1                | Q8JKL4           | Ndufa3    | 21 kDa           | 2.7702  | 5.9811     | 2.16        |
| 78  | Transformin-2, protein homolog beta OS=Mus musculus (Mouse) OX=10090 GN=Tra2b PE=1 SV=1                                                  | P82996           | Tra2b     | 34 kDa           | 2.7702  | 5.9811     | 2.16        |
| 79  | Lipoprotein lipase OS=Mus musculus (Mouse) OX=10090 GN=Lpl PE=1 SV=3                                                                     | P11152           | Lpl       | 53 kDa           | 3.6936  | 5.9811     | 1.62        |
| 80  | NADH dehydrogenase [ubiquinone] 1 alpha subcomplex subunit 2 OS=Mus musculus (Mouse) OX=10090 GN=Ndufa2 PE=1 SV=3                        | Q8CQ75           | Ndufa2    | 11 kDa           | 4.617   | 5.9811     | 1.30        |
| 81  | Cytochrome c1, heme protein, mitochondrial OS=Mus musculus (Mouse) OX=10090 GN=Cyc1 PE=1 SV=1                                            | Q8D0M3           | Cyc1      | 35 kDa           | 0       | 4.7849     |             |
| 82  | NADH dehydrogenase [ubiquinone] 1 beta subcomplex subunit 9 OS=Mus musculus (Mouse) OX=10090 GN=Ndufb9 PE=1 SV=3                         | Q8CQJ8           | Ndufb9    | 22 kDa           | 0       | 4.7849     | 2.59        |
| 83  | Mitochondrial import receptor TOM22 homolog OS=Mus musculus (Mouse) OX=10090 GN=Tom22 PE=1 SV=3                                          | Q8CPO3           | Tom22     | 16 kDa           | 1.8468  | 4.7849     | 2.59        |
| 84  | NADH dehydrogenase [ubiquinone] 1 alpha subcomplex subunit 7 OS=Mus musculus (Mouse) OX=10090 GN=Ndufa7 PE=1 SV=3                        | Q8Z1P6           | Ndufa7    | 13 kDa           | 1.8468  | 4.7849     | 1.73        |
| 85  | 26S proteasome non-ATPase regulatory subunit 9 OS=Mus musculus (Mouse) OX=10090 GN=Psmd9 PE=1 SV=1                                       | Q8CR00           | Psmd9     | 25 kDa           | 2.7702  | 4.7849     | 1.73        |
| 86  | HIACA ribonucleoprotein complex subunit 2 OS=Mus musculus (Mouse) OX=10090 GN=Nhp2 PE=1 SV=1                                             | Q8CRB2           | Nhp2      | 17 kDa           | 2.7702  | 4.7849     | 1.73        |
| 87  | Histone H2A type 2-A OS=Mus musculus (Mouse) OX=10090 GN=H2ah2a2a1 PE=1 SV=3                                                             | Q8GSS7           | H2ah2a2a1 | 14 kDa           | 2.7702  | 4.7849     | 1.73        |
| 88  | Serine/arginine-rich splicing factor 1 OS=Mus musculus (Mouse) OX=10090 GN=Srsf1 PE=1 SV=3                                               | Q8PDM2           | Srsf1     | 28 kDa           | 2.7702  | 4.7849     | 1.73        |
| 89  | 60S acidic ribosomal protein P1 OS=Mus musculus (Mouse) OX=10090 GN=Rplp1 PE=1 SV=1                                                      | P47955           | Rplp1     | 11 kDa           | 3.6936  | 4.7849     | 1.30        |
| 90  | Cytochrome c oxidase subunit 7A1, mitochondrial OS=Mus musculus (Mouse) OX=10090 GN=Cox7a1 PE=1 SV=1                                     | P86392           | Cox7a1    | 9 kDa            | 3.6936  | 4.7849     | 1.30        |
| 91  | DNA-directed RNA polymerase I, II, and III subunit RPABC3 OS=Mus musculus (Mouse) OX=10090 GN=Polr2h PE=1 SV=3                           | P81174           | Polr2h    | 17 kDa           | 3.6936  | 4.7849     | 1.30        |
| 92  | Long-chain specific acyl-CoA dehydrogenase, mitochondrial OS=Mus musculus (Mouse) OX=10090 GN=Acadl PE=1 SV=2                            | Q823G2           | Acadl     | 48 kDa           | 3.6936  | 4.7849     | 1.30        |
| 93  | Melanin-2 OS=Mus musculus (Mouse) OX=10090 GN=Mx2 PE=1 SV=1                                                                              | Q88441           | Mx2       | 30 kDa           | 3.6936  | 4.7849     | 1.30        |
| 94  | Scaffold attachment factor B1 OS=Mus musculus (Mouse) OX=10090 GN=Saifb PE=1 SV=2                                                        | D3YX41           | Saifb     | 105 kDa          | 3.6936  | 4.7849     | 1.30        |
| 95  | Serine/threonine-protein phosphatase 2A, 55 kDa regulatory subunit B alpha isoform OS=Mus musculus (Mouse) OX=10090 GN=Ppp2r2a PE=1 SV=1 | Q8P1F6           | Ppp2r2a   | 52 kDa           | 3.6936  | 4.7849     | 1.30        |
| 96  | Desmoplakin OS=Mus musculus (Mouse) OX=10090 GN=Dsp PE=1 SV=1                                                                            | E9Q557           | Dsp       | 333 kDa          | 0       | 3.5887     |             |
| 97  | Guanine nucleotide-binding protein G(I)/G(S)/G(T) subunit beta-1 OS=Mus musculus (Mouse) OX=10090 GN=Gnb1 PE=1 SV=3                      | P82874           | Gnb1      | 37 kDa           | 0       | 3.5887     |             |
| 98  | Kinesin heavy chain isoform 5C OS=Mus musculus (Mouse) OX=10090 GN=Kif5c PE=1 SV=3                                                       | P28738           | Kif5c     | 109 kDa          | 0       | 3.5887     | 1.94        |
| 99  | Chromobox protein homolog 3 OS=Mus musculus (Mouse) OX=10090 GN=Cbx3 PE=1 SV=2                                                           | P23198           | Cbx3      | 21 kDa           | 1.8468  | 3.5887     | 1.94        |
| 100 | Eukaryotic translation initiation factor 3 subunit F OS=Mus musculus (Mouse) OX=10090 GN=Elf3f PE=1 SV=2                                 | Q8DCH4           | Elf3f     | 38 kDa           | 1.8468  | 3.5887     | 1.94        |
| 101 | KH domain-containing, RNA-binding, signal transduction-associated protein 1 OS=Mus musculus (Mouse) OX=10090 GN=Khdrbs1 PE=1 SV=2        | Q8Q749           | Khdrbs1   | 48 kDa           | 1.8468  | 3.5887     | 1.94        |
| 102 | Latein OS=Mus musculus (Mouse) OX=10090 GN=Lxn PE=1 SV=2                                                                                 | P70202           | Lxn       | 25 kDa           | 1.8468  | 3.5887     | 1.94        |
| 103 | Thrombospondin type-1 domain-containing protein 7A OS=Mus musculus (Mouse) OX=10090 GN=Thsd7a PE=1 SV=2                                  | Q89ZU6           | Thsd7a    | 184 kDa          | 1.8468  | 3.5887     | 1.94        |
| 104 | U1 small nuclear ribonucleoprotein A OS=Mus musculus (Mouse) OX=10090 GN=Snpa PE=1 SV=3                                                  | Q82189           | Snpa      | 32 kDa           | 1.8468  | 3.5887     | 1.94        |
| 105 | Vitamin D-binding protein OS=Mus musculus (Mouse) OX=10090 GN=Gc PE=1 SV=2                                                               | P21614           | Gc        | 54 kDa           | 1.8468  | 3.5887     | 1.94        |
| 106 | 40S ribosomal protein S21 OS=Mus musculus (Mouse) OX=10090 GN=Rps21 PE=1 SV=1                                                            | Q8CQR2           | Rps21     | 9 kDa            | 0       | 2.3925     |             |
| 107 | Acetyl-CoA carboxylase 2 OS=Mus musculus (Mouse) OX=10090 GN=Acacb PE=1 SV=1                                                             | E9Q4Z2           | Acacb     | 276 kDa          | 0       | 2.3925     |             |
| 108 | Actin-binding LIM protein 1 OS=Mus musculus (Mouse) OX=10090 GN=Ablim1 PE=1 SV=1                                                         | Q8K4G5           | Ablim1    | 97 kDa           | 0       | 2.3925     |             |
| 109 | Actin-related protein 2/3 complex subunit 2 OS=Mus musculus (Mouse) OX=10090 GN=Arpc2 PE=1 SV=3                                          | Q8CVB6           | Arpc2     | 34 kDa           | 0       | 2.3925     |             |
| 110 | Bridging integrator 2 OS=Mus musculus (Mouse) OX=10090 GN=Bin2 PE=1 SV=1                                                                 | D3Z6Q9           | Bin2      | 53 kDa           | 0       | 2.3925     |             |
| 111 | Cadherin-13 OS=Mus musculus (Mouse) OX=10090 GN=Cdh13 PE=1 SV=2                                                                          | Q8WTR5           | Cdh13     | 78 kDa           | 0       | 2.3925     |             |
| 112 | COP9 signalosome complex subunit 8 OS=Mus musculus (Mouse) OX=10090 GN=Cops8 PE=1 SV=1                                                   | Q8BV77           | Cops8     | 23 kDa           | 0       | 2.3925     |             |
| 113 | E3 ubiquitin-protein ligase RIMN5A OS=Mus musculus (Mouse) OX=10090 GN=Rimn5a PE=1 SV=2                                                  | Q8VQ08           | Rimn5a    | 44 kDa           | 0       | 2.3925     |             |
| 114 | Glutaryl-CoA dehydrogenase, mitochondrial OS=Mus musculus (Mouse) OX=10090 GN=Gcdh PE=1 SV=2                                             | Q80759           | Gcdh      | 49 kDa           | 0       | 2.3925     |             |
| 115 | Histidine-rich calcium-binding protein OS=Mus musculus (Mouse) OX=10090 GN=Hrc PE=1 SV=1                                                 | G8E8J6           | Hrc       | 85 kDa           | 0       | 2.3925     |             |
| 116 | NADH dehydrogenase [ubiquinone] 1 alpha subcomplex subunit 9, mitochondrial OS=Mus musculus (Mouse) OX=10090 GN=Ndufa9 PE=1 SV=2         | Q8DC69           | Ndufa9    | 43 kDa           | 0       | 2.3925     |             |
| 117 | Predicted gene 11639 OS=Mus musculus (Mouse) OX=10090 GN=Gm11639 PE=1 SV=1                                                               | AA01D5RLM8-DECOY |           | 42 kDa           | 0       | 2.3925     |             |
| 118 | Protein phosphatase 1A OS=Mus musculus (Mouse) OX=10090 GN=Ppm1a PE=1 SV=1                                                               | P46443           | Ppm1a     | 42 kDa           | 0       | 2.3925     |             |
| 119 | Ribose-phosphate phosphokinase OS=Mus musculus (Mouse) OX=10090 GN=Ppks111 PE=1 SV=1                                                     | Q8C3R8           | Ppks111   | 35 kDa           | 0       | 2.3925     |             |
| 120 | Synaptodin-2 OS=Mus musculus (Mouse) OX=10090 GN=Synpd2 PE=1 SV=2                                                                        | Q81YE8           | Synpd2    | 117 kDa          | 0       | 2.3925     |             |
| 121 | Translocin-associated protein subunit alpha OS=Mus musculus (Mouse) OX=10090 GN=Sar1 PE=1 SV=1                                           | Q8CY50           | Sar1      | 32 kDa           | 0       | 2.3925     |             |

Note: Red labeled proteins are mitochondrial proteins.

**Supplementary Table S2: Primer information.**

| <b>Name</b>                       |          | <b>Sequence</b>                        |
|-----------------------------------|----------|----------------------------------------|
| <i>circSlc8a1/cA-circSlc8a1-1</i> | Forward: | 5'-ctattgaaggcacagcccagg-3'            |
|                                   | Reverse: | 5'-gtacaataagactccaactgc-3'            |
| <i>circSlc8a1/cA-circSlc8a1-2</i> | Forward: | 5'-acagcccaggtggaggggaagac-3'          |
|                                   | Reverse: | 5'-ggtgggagacttaatcgaagcatg-3'         |
| <i>Slc8a1</i> mRNA                | Forward: | 5' gagcagccttcagagctggtcgg-3'          |
|                                   | Reverse: | 5'-gtacaataagactccaactgc-3'            |
| RNU6                              | Forward: | 5'-gtgctcgcttcggcagcacata-3'           |
|                                   | Reverse: | 5'-tggaacgcttcacgaatttgcg-3'           |
| <i>Gapdh</i>                      | Forward: | 5'-cccactgaagggtggagcc-3'              |
|                                   | Reverse: | 5'-acaatcttgagtgagttgtc-3'             |
| <i>cA-circSlc8a1</i> precursor    | Forward: | 5'-acagcccaggtggaggggaagac-3'          |
|                                   | Reverse: | 5'-gagctgtcagagatttccaacc-3'           |
| <i>cA-circSlc8a1</i> genotyping   | Forward: | 5'gggcccgcctcgagacacttagcctgttctt-3'   |
|                                   | Reverse: | 5'-ggtgggagacttaatcgaagcatg-3'         |
| <i>circSlc8a1</i> genotyping      | Forward: | 5'-tgtggagagctcgaattccagaa-3'          |
|                                   | Reverse: | 5'-gcatgcatagatcttacggaaaacggcagaag-3' |
| <i>collagen1a1</i>                | Forward: | 5'-gaatggagatgatgggaagctgg-3'          |
|                                   | Reverse: | 5'-catctccttggcaccatccaaac-3'          |
| <i>collagen3a1</i>                | Forward: | 5'-gtaaagaagtctctgaagctgatg-3'         |
|                                   | Reverse: | 5'-gcgatatctatgatggtagtctc-3'          |
| ANP                               | Forward: | 5'-gcggtgtccaacacagatctgatg-3'         |
|                                   | Reverse: | 5'-ggtgggttgacctcccagtcag-3'           |
| BNP                               | Forward: | 5'-gagcaattcaagatgcaggtgagc-3'         |
|                                   | Reverse: | 5'-cacacacacctgaatccccatcc-3'          |
